# Supplementary material for: Association between domains of quality of life and patients with Klinefelter syndrome: a systematic review
Source: PubMed Central journal article supplement (PMC9254297; doi:10.1530/eje-21-1239), 2022-05-31
Supplement: supplementary_material.pdf [file supplementary_material.pdf]

## Supplementary material

### Appendix A: Inclusion/Exclusion criteria.

| <b>Include</b>                                                          | <b>Exclude</b>                                   |
|-------------------------------------------------------------------------|--------------------------------------------------|
| All quantitative empirical studies                                      | Systematic reviews                               |
| Patients with Klinefelter syndrome, all ages                            | Meta-analysis                                    |
| Outcome measures related to QoL and WHOQOL-100 dimensions (subsections) | Guidelines, position statements and case studies |
| Human studies only                                                      | Qualitative studies                              |
| Full text available                                                     | Animal studies                                   |
| Peer-reviewed published studies                                         | Reviews, editorials and opinion papers           |
| Manuscripts in English                                                  | Duplicated cohorts                               |
| Studies with comparison groups                                          | Studies without comparison groups                |

## Appendix B: Literature search strategy, CINAHL

Select / deselect all

| Search ID#                   | Search Terms                                                                                                               | Search Options                                                                       | Actions                                                                                      |
|------------------------------|----------------------------------------------------------------------------------------------------------------------------|--------------------------------------------------------------------------------------|----------------------------------------------------------------------------------------------|
| <input type="checkbox"/> S10 | S1 AND S9                                                                                                                  | <b>Expanders</b> - Apply equivalent subjects<br><b>Search modes</b> - Boolean/Phrase | <a href="#">View Results</a> (35)   <a href="#">View Details</a>   <a href="#">Edit</a>      |
| <input type="checkbox"/> S9  | S2 OR S3 OR S4 OR S5 OR S6 OR S7 OR S8                                                                                     | <b>Expanders</b> - Apply equivalent subjects<br><b>Search modes</b> - Boolean/Phrase | <a href="#">View Results</a> (643,721)   <a href="#">View Details</a>   <a href="#">Edit</a> |
| <input type="checkbox"/> S8  | spirituality OR religion OR personal beliefs                                                                               | <b>Expanders</b> - Apply equivalent subjects<br><b>Search modes</b> - Boolean/Phrase | <a href="#">View Results</a> (34,917)   <a href="#">View Details</a>   <a href="#">Edit</a>  |
| <input type="checkbox"/> S7  | environment                                                                                                                | <b>Expanders</b> - Apply equivalent subjects<br><b>Search modes</b> - Boolean/Phrase | <a href="#">View Results</a> (184,599)   <a href="#">View Details</a>   <a href="#">Edit</a> |
| <input type="checkbox"/> S6  | social relations                                                                                                           | <b>Expanders</b> - Apply equivalent subjects<br><b>Search modes</b> - Boolean/Phrase | <a href="#">View Results</a> (4,340)   <a href="#">View Details</a>   <a href="#">Edit</a>   |
| <input type="checkbox"/> S5  | level of independence                                                                                                      | <b>Expanders</b> - Apply equivalent subjects<br><b>Search modes</b> - Boolean/Phrase | <a href="#">View Results</a> (1,216)   <a href="#">View Details</a>   <a href="#">Edit</a>   |
| <input type="checkbox"/> S4  | psychological                                                                                                              | <b>Expanders</b> - Apply equivalent subjects<br><b>Search modes</b> - Boolean/Phrase | <a href="#">View Results</a> (256,562)   <a href="#">View Details</a>   <a href="#">Edit</a> |
| <input type="checkbox"/> S3  | physical health                                                                                                            | <b>Expanders</b> - Apply equivalent subjects<br><b>Search modes</b> - Boolean/Phrase | <a href="#">View Results</a> (49,724)   <a href="#">View Details</a>   <a href="#">Edit</a>  |
| <input type="checkbox"/> S2  | quality of life                                                                                                            | <b>Expanders</b> - Apply equivalent subjects<br><b>Search modes</b> - Boolean/Phrase | <a href="#">View Results</a> (191,559)   <a href="#">View Details</a>   <a href="#">Edit</a> |
| <input type="checkbox"/> S1  | klinefelter syndrome OR 48, xxy syndrome OR 49 xxxxy syndrome OR xxxy males OR xxy syndrome OR xxy trisomy OR xxy syndrome | <b>Expanders</b> - Apply equivalent subjects<br><b>Search modes</b> - Boolean/Phrase | <a href="#">View Results</a> (472)   <a href="#">View Details</a>   <a href="#">Edit</a>     |

## Appendix C: Literature search strategy, MEDLINE

| <input type="checkbox"/> Select / deselect all <input type="button" value="Search with AND"/> <input type="button" value="Search with OR"/> <input type="button" value="Delete Searches"/> <span style="float: right;"><input type="button" value="Refresh Search Results"/></span> |                                                                                                           |                                                                                                                                                            |                                                                                                |
|-------------------------------------------------------------------------------------------------------------------------------------------------------------------------------------------------------------------------------------------------------------------------------------|-----------------------------------------------------------------------------------------------------------|------------------------------------------------------------------------------------------------------------------------------------------------------------|------------------------------------------------------------------------------------------------|
| Search ID#                                                                                                                                                                                                                                                                          | Search Terms                                                                                              | Search Options                                                                                                                                             | Actions                                                                                        |
| <input type="checkbox"/> S10                                                                                                                                                                                                                                                        | S1 AND S9                                                                                                 | <b>Expanders</b> - Apply equivalent subjects<br><b>Search modes</b> - Boolean/Phrase                                                                       | <a href="#">View Results (150)</a>   <a href="#">View Details</a>   <a href="#">Edit</a>       |
| <input type="checkbox"/> S9                                                                                                                                                                                                                                                         | S2 OR S3 OR S4 OR S5 OR S6 OR S7 OR S8                                                                    | <b>Expanders</b> - Apply equivalent subjects<br><b>Search modes</b> - Boolean/Phrase                                                                       | <a href="#">View Results (1,592,497)</a>   <a href="#">View Details</a>   <a href="#">Edit</a> |
| <input type="checkbox"/> S8                                                                                                                                                                                                                                                         | spirituality OR religion OR personal beliefs                                                              | <b>Limiters</b> - Date of Publication: -20200131; English Language<br><b>Expanders</b> - Apply equivalent subjects<br><b>Search modes</b> - Boolean/Phrase | <a href="#">View Results (45,355)</a>   <a href="#">View Details</a>   <a href="#">Edit</a>    |
| <input type="checkbox"/> S7                                                                                                                                                                                                                                                         | environment                                                                                               | <b>Limiters</b> - Date of Publication: -20200131; English Language<br><b>Expanders</b> - Apply equivalent subjects<br><b>Search modes</b> - Boolean/Phrase | <a href="#">View Results (744,220)</a>   <a href="#">View Details</a>   <a href="#">Edit</a>   |
| <input type="checkbox"/> S6                                                                                                                                                                                                                                                         | social relations                                                                                          | <b>Limiters</b> - Date of Publication: -20200131; English Language<br><b>Expanders</b> - Apply equivalent subjects<br><b>Search modes</b> - Boolean/Phrase | <a href="#">View Results (7,028)</a>   <a href="#">View Details</a>   <a href="#">Edit</a>     |
| <input type="checkbox"/> S5                                                                                                                                                                                                                                                         | level of independence                                                                                     | <b>Limiters</b> - Date of Publication: -20200131; English Language<br><b>Expanders</b> - Apply equivalent subjects<br><b>Search modes</b> - Boolean/Phrase | <a href="#">View Results (2,031)</a>   <a href="#">View Details</a>   <a href="#">Edit</a>     |
| <input type="checkbox"/> S4                                                                                                                                                                                                                                                         | psychological                                                                                             | <b>Limiters</b> - Date of Publication: -20200131; English Language<br><b>Expanders</b> - Apply equivalent subjects<br><b>Search modes</b> - Boolean/Phrase | <a href="#">View Results (536,843)</a>   <a href="#">View Details</a>   <a href="#">Edit</a>   |
| <input type="checkbox"/> S3                                                                                                                                                                                                                                                         | physical health                                                                                           | <b>Limiters</b> - Date of Publication: -20200131; English Language<br><b>Expanders</b> - Apply equivalent subjects<br><b>Search modes</b> - Boolean/Phrase | <a href="#">View Results (73,599)</a>   <a href="#">View Details</a>   <a href="#">Edit</a>    |
| <input type="checkbox"/> S2                                                                                                                                                                                                                                                         | quality of life                                                                                           | <b>Limiters</b> - Date of Publication: -20200131; English Language<br><b>Expanders</b> - Apply equivalent subjects<br><b>Search modes</b> - Boolean/Phrase | <a href="#">View Results (309,792)</a>   <a href="#">View Details</a>   <a href="#">Edit</a>   |
| <input type="checkbox"/> S1                                                                                                                                                                                                                                                         | Klinefelter Syndrome OR 48, xxy syndrome OR 49 xxxxy syndrome OR xxy males OR xxy syndrome OR xxy trisomy | <b>Limiters</b> - Date of Publication: -20200131; English Language<br><b>Expanders</b> - Apply equivalent subjects<br><b>Search modes</b> - Boolean/Phrase | <a href="#">View Results (3,409)</a>   <a href="#">View Details</a>   <a href="#">Edit</a>     |

Appendix D: Joanna Briggs Quality appraisal tool: Analytical Cross-Sectional Studies.

| Author & year                            | Were the criteria for inclusion in the sample clearly defined? | Were the study subjects and the setting described in detail? | Was the exposure measured in a valid and reliable way? | Were objective, standard criteria used for measurement of the condition? | Were confounding factors identified? | Were strategies to deal with confounding factors stated? | Were the outcomes measured in a valid and reliable way? | Was appropriate statistical analysis used? |
|------------------------------------------|----------------------------------------------------------------|--------------------------------------------------------------|--------------------------------------------------------|--------------------------------------------------------------------------|--------------------------------------|----------------------------------------------------------|---------------------------------------------------------|--------------------------------------------|
| (Ferlin et al., 2018)                    | Y                                                              | Y                                                            | Y                                                      | Y                                                                        | N                                    | N                                                        | Y                                                       | Y                                          |
| (Fisher et al., 2015)                    | Y                                                              | Y                                                            | Y                                                      | Y                                                                        | Y                                    | N                                                        | Y                                                       | Y                                          |
| (Herlihy et al., 2011)                   | Y                                                              | Y                                                            | Y                                                      | Y                                                                        | Y                                    | N                                                        | Y                                                       | Y                                          |
| (K,Sorensen, 1992)                       | Y                                                              | Y                                                            | Y                                                      | Y                                                                        | N                                    | N                                                        | Y                                                       | Y                                          |
| (Rapp et al., 2018)                      | Y                                                              | Y                                                            | Y                                                      | Y                                                                        | Y                                    | Y                                                        | Y                                                       | Y                                          |
| (Rijn, 2018)                             | Y                                                              | Y                                                            | Y                                                      | Y                                                                        | N                                    | N                                                        | Y                                                       | Y                                          |
| (Skakkebaek et al., 2018)                | Y                                                              | Y                                                            | Y                                                      | Y                                                                        | Y                                    | N                                                        | Y                                                       | Y                                          |
| (Skakkebaek et al., 2017)                | Y                                                              | Y                                                            | Y                                                      | Y                                                                        | Unclear                              | N                                                        | Y                                                       | Y                                          |
| (Van Rijn et al., 2014)                  | Y                                                              | Y                                                            | Y                                                      | Y                                                                        | Y                                    | N                                                        | Y                                                       | Y                                          |
| (Van Rijn, Swaab, Aleman and Khan, 2008) | Y                                                              | Y                                                            | Y                                                      | Y                                                                        | N                                    | N                                                        | Y                                                       | Y                                          |

|                         |   |   |   |   |   |   |         |   |
|-------------------------|---|---|---|---|---|---|---------|---|
| (Liberato et al., 2017) | Y | Y | Y | Y | N | N | Unclear | Y |
| (Fabrazzo et al., 2021) | Y | Y | Y | Y | Y | N | Y       | Y |

Appendix E: Joanna Briggs Quality appraisal tool: Cohort Studies.

| Author & year              | Were the two groups similar and recruited from the same population? | Were the exposures measured similarly to assign people to both exposed and unexposed groups? | Was the exposure measured in a valid and reliable way? | Were confounding factors identified? | Were strategies to deal with confounding factors stated? | Were the groups/participants free of the outcome at the start of the study (or at the moment of exposure)? | Were the outcomes measured in a valid and reliable way? | Was the follow up time reported and sufficient to be long enough for outcomes to occur? | Was follow up complete, and if not, were the reasons to loss to follow up described and explored? | Were strategies to address incomplete follow up utilized? | Was appropriate statistical analysis used? |
|----------------------------|---------------------------------------------------------------------|----------------------------------------------------------------------------------------------|--------------------------------------------------------|--------------------------------------|----------------------------------------------------------|------------------------------------------------------------------------------------------------------------|---------------------------------------------------------|-----------------------------------------------------------------------------------------|---------------------------------------------------------------------------------------------------|-----------------------------------------------------------|--------------------------------------------|
| (Nielsen and Pelsen, 1987) | Y                                                                   | N/A                                                                                          | Y                                                      | N                                    | N                                                        | N/A                                                                                                        | Y                                                       | Y                                                                                       | Y                                                                                                 | N                                                         | Y                                          |

Appendix F: Full text review. Included, Excluded studies with reasons

| #  | Author & Year                             | Is a full text copy of the study available? | Are patients Males with a clinical KS diagnosis?                                                                     | Is it primary research?<br><i>If YES specify the type of study.</i> | Is the study measuring QOL?<br><i>If YES which parameters does it meet e.g. 'Physical health, Environment, Psychological, Social Relations, Level of Independence'</i> | Can an explicit method or measurement of assessment of these parameters be identified?<br><i>If YES, specify the measurement of assessment.</i>                             | If study is a cohort or an interventional study,<br><br><i>What is the comparator?</i>            | Is there an outcome associated with QOL and patients with KS?<br><br><i>If YES, what is the outcome?</i>                               | Decision: Include or Exclude.<br><br><i>If Excluded give reason.</i>     |
|----|-------------------------------------------|---------------------------------------------|----------------------------------------------------------------------------------------------------------------------|---------------------------------------------------------------------|------------------------------------------------------------------------------------------------------------------------------------------------------------------------|-----------------------------------------------------------------------------------------------------------------------------------------------------------------------------|---------------------------------------------------------------------------------------------------|----------------------------------------------------------------------------------------------------------------------------------------|--------------------------------------------------------------------------|
| 1. | (Bender et al., 2001)                     | Y                                           | N - Mix patient group of 23 patients with other genetic conditions, KS not labelled or clinical diagnosis confirmed. | Y - Cross-sectional study                                           | Y - Psychological, Thinking, learning , memory.                                                                                                                        | Y – Wisconsin card sorting, Woodcock tests. WRAT, WAIS-R tests, WAIRS-R Full-scale IQ                                                                                       | Y - “Controls, including 11 male and 11 female siblings of propositi, were karyotypically normal” | Y - “In summary, the presence of an SCA results in increased potential for learning problems in childhood that persist into adulthood” | <b>Exclude</b><br>-KS patients not defined or identified within results. |
| 2. | (Close, Fennoy, Smaldone and Reame, 2015) | Y                                           | Y                                                                                                                    | Y – Cross-sectional study                                           | Y – Psychological                                                                                                                                                      | Y –Questionnaires: Paediatric QOL inventory 4.0 health related- QOL, Piers-Harris 2 self concept scale, Coopersmith self-esteem inventory, Children’s depression inventory. | N/A                                                                                               | Y -“Depending on the degree of phenotypic abnormality, boys with KS may be at risk for impaired QOL”                                   | <b>Exclude</b><br>-No comparator                                         |
| 3. | (Ferlin et al., 2018)                     | Y                                           | Y                                                                                                                    | Y – Part being assessed Cross-sectional study, second part Non-RCT  | Y – Social relations, sexual activity.                                                                                                                                 | Y - 15-Item International Index of Erectile Function, endocrine assessment,                                                                                                 | Y - 60 age matched controls.                                                                      | Y – “KS subjects have lower sexual desire, intercourse satisfaction”                                                                   | <b>Include</b>                                                           |
| 4. | (Boratynska-Dabrowsk et al., 1970)        | N                                           | N/A                                                                                                                  | N/A                                                                 | N/A                                                                                                                                                                    | N/A                                                                                                                                                                         | N/A                                                                                               | N/A                                                                                                                                    | <b>Exclude</b><br>– No full text                                         |

|     |                        |   |                                                     |                                                                   |                                                                                                          |                                                                                                                                                                                               |                                                                                                |                                                                                                                                                                                                            |                                                    |
|-----|------------------------|---|-----------------------------------------------------|-------------------------------------------------------------------|----------------------------------------------------------------------------------------------------------|-----------------------------------------------------------------------------------------------------------------------------------------------------------------------------------------------|------------------------------------------------------------------------------------------------|------------------------------------------------------------------------------------------------------------------------------------------------------------------------------------------------------------|----------------------------------------------------|
| 5.  | (Herlihy, 2017)        | N | N/A                                                 | N/A                                                               | N/A                                                                                                      | N/A                                                                                                                                                                                           | N/A                                                                                            | N/A                                                                                                                                                                                                        | <b>Exclude</b><br>- No full text                   |
| 6.  | (Close,2011)           | Y | Y – 43 KS males                                     | Y- Mixed methods (Cross-sectional and retrospective chart review) | Y - Physical health, Psychological                                                                       | Y – Questionnaires, (Peds QL4.0), Coopersmith self-esteem inventory, Piers-Harris2 short form, (CDI), Physical problems frequencies.                                                          | N/A                                                                                            | Y – "Findings of the current study suggest that a high portion of KS (67.4%) have poor total QOL"                                                                                                          | <b>Exclude</b><br>-No comparator                   |
| 7.  | (Fisher et al., 2015)  | Y | Y                                                   | Y- Cross sectional study                                          | Y – Social relations /sexual activity. Psychological/Thinking learning memory and concentration.         | Y – Questionnaires. Psychometric tests. (AQ) (RME) (GIDYQ-AA) (SAST) (SCL-90-R) Wechsler Adult Intelligence scale-Revised.                                                                    | Y- 43 healthy male controls.                                                                   | Y- "KS is associated with hyper sexuality, paraphilic, and GB, which were mediated by obsessive compulsive and autistic traits."                                                                           | <b>Include</b>                                     |
| 8.  | (Herlihy et al., 2011) | Y | Y – Males 18 years and older                        | Y – Cross sectional study                                         | Y – Psychological, Environment, Social care. Bodily image, Self-esteem, general health, Sexual activity. | Y – (PWI), global life satisfaction, (MBSRQ-AS), Appearance Evaluation, Appearance Orientation subscale, (RSE), (K10), (SIS), (QRI), (Short form-1)                                           | N/A                                                                                            | Y – Shows KS has a significant personal impact.                                                                                                                                                            | <b>Include</b>                                     |
| 9.  | (K,Sorensen, 1992)     | Y | Y – 14 males with KS                                | Y- Cross sectional study                                          | Y – Sexual activity, Psychological/ memory, learning and concentration.                                  | Y – Wechsler Adult Intelligence Scale, School attainment. Mean scores for school difficulties including, Concentration, speech, interest. Experience of coitus and frequency of masturbation. | Y – 19 healthy male controls were used in the studies measuring QOL that have been identified. | Y – "subjects had increased height, reduced weight, impaired hearing, slightly lower intelligence, poor school performance, increased incidence of psychological consultation and lowered sexual activity. | <b>Include</b>                                     |
| 10. | (Khan et al., 2018)    | Y | Y – 154 KS diagnosed patients amongst mixed cohort. | Y – Cohort study                                                  | N                                                                                                        | N                                                                                                                                                                                             | N                                                                                              | N                                                                                                                                                                                                          | <b>Exclude</b><br>-QOL is not explicitly measured. |



|     |                           |   |                                                                                                       |                                                    |                                                                        |                                                                                                               |                                                           |                                                                                                                                                                                     |                                                                                                               |
|-----|---------------------------|---|-------------------------------------------------------------------------------------------------------|----------------------------------------------------|------------------------------------------------------------------------|---------------------------------------------------------------------------------------------------------------|-----------------------------------------------------------|-------------------------------------------------------------------------------------------------------------------------------------------------------------------------------------|---------------------------------------------------------------------------------------------------------------|
| 11. | (Liberato et al., 2017)   | Y | Y – 58 Adult male KS patients                                                                         | Y – Cross sectional observation                    | Y – Psychological                                                      | Y – Clinical interview and questionnaires measuring. (SCID-ii), (MMPI-2), (SPM).                              | N/A                                                       | Y – PD prevalence was higher than in the general population.                                                                                                                        | <b>Include</b>                                                                                                |
| 12. | (Nielsen and Pelsen 1987) | Y | Y – 34 KS, 16 hypogonadal males without KS diagnosis.                                                 | Y - 20 year follow up study.                       | Y – Psychological, Sexual activity, Level of independence              | Y – Anamnestic information and psychopathological symptoms. Occupation status & change in job responsibility, | Y – 16 hypogonadal males without KS diagnosis.            | Y – Showed controls and KS patients had better than expected results in the tested measures, however this was post diagnosis and medical intervention for the previous twenty year. | <b>Include</b>                                                                                                |
| 13. | (Rapp et al., 2018)       | Y | Y – 218 Klinefelter syndrome, other groups in study. KS clearly labelled throughout, where necessary. | Y- Multicentre cross-sectional clinical evaluation | Y – WHOQOL brief                                                       | Y – (WHOQOL-100 BREF) is used for KS patients.                                                                | Y – Healthy European populations.                         | Y – The study shows that all conditions included shows a that there's a significant lower QOL for the patients compared to controls.                                                | <b>Include</b>                                                                                                |
| 14. | (Rijn, 2018)              | Y | Y- 20 KS boys.                                                                                        | Y – Cross sectional study                          | Y – Psychological, Intellectual functioning and social anxiety.        | Y – IQ, Social Anxiety Scale,                                                                                 | Y - 25, non-clinical controls between 8 and 19 years old. | Y – Mean level of intellectual functioning was significantly lower                                                                                                                  | <b>Include</b>                                                                                                |
| 15. | (Skakkebaek et al., 2014) | Y | Y – 73 KS males were used, Subgroups of Paternal, maternal, skewed and no skewed                      | Y – Cross sectional study                          | Y – Psychological,                                                     | Y – Autism spectrum Quotient scores. (SCL)                                                                    | Y – 73 controls                                           | N                                                                                                                                                                                   | <b>Exclude</b><br>-Unable to determine QOL outcomes from study as results cannot be analysed due to subgroup. |
| 16. | (Skakkebaek et al., 2018) | Y | Y – 132 KS males                                                                                      | Y – Cross-sectional study                          | Y – Psychological, Physical health, Social relations, Sexual activity. | Y – Questionnaires completed by KS patients. (IIEF-15), (WHOQOL-BREF).                                        | Y – 313 matches controls                                  | Y – KS status is associated with lower PQOL and MQOL.                                                                                                                               | <b>Include</b>                                                                                                |
| 17. | (Skakkebaek et al 2017)   | Y | Y – 69 KS males                                                                                       | Y – Cross-sectional study                          | Y – Psychological,                                                     | Y – Questionnaires, IQ, (AQ scale), cognitive performance.                                                    | Y- 69 Controls                                            | Y- KS is associated with lower intelligence and poorer social skills                                                                                                                | <b>Include</b>                                                                                                |

|     |                                                   |   |                                         |                            |                    |                                                                                               |                             |                                                                                                           |                                                                                                                    |
|-----|---------------------------------------------------|---|-----------------------------------------|----------------------------|--------------------|-----------------------------------------------------------------------------------------------|-----------------------------|-----------------------------------------------------------------------------------------------------------|--------------------------------------------------------------------------------------------------------------------|
| 18. | (Skakkebaek et al., 2018) Anxiety and depression. | Y | N/A                                     | N/A                        | N/A                | N/A                                                                                           | N/A                         | N/A                                                                                                       | <b>Exclude</b><br>-Results in table one are identical to table one in, (Skakkebaek et al.,2017) The role of genes. |
| 19. | (Tartaglia et al., 2010)                          | Y | Y – 57 Children and adolescents with KS | Y – Cross sectional study  | Y – Psychological, | Y – Questionnaires, Including (WISC-IV), (WASI), (SRS), ADHD symptoms, (ADI-R), (ADOS),       | N/A                         | Y – Diagnosis of KS support having greater prevalence of psychological conditions and cognitive function. | <b>Exclude</b><br>-No comparator                                                                                   |
| 20. | (Temple and Sanfilippo,2003)                      | Y | Y – 3 KS                                | Y – Case study             | N/A                | N/A                                                                                           | N/A                         | N/A                                                                                                       | <b>Exclude</b><br>-Case study                                                                                      |
| 21. | (Turrieff, Levy and Bisecker, 2011)               | Y | Y- 310 self reported XXY aged 14-75     | Y – Cross sectional study  | Y – Psychological  | Y – Questionnaire using online websites. (CES-D),                                             | N/A                         | Y – KS may be at increased risk for depressive symptoms.                                                  | <b>Exclude</b><br>-No comparator                                                                                   |
| 22. | (Turrieff, Levy and Bisecker,2015)                | Y | Y- 310 self reported XXY aged 14-75     | N/A                        | N/A                | N/A                                                                                           | N/A                         | N/A                                                                                                       | <b>Exclude</b><br>-Participation cohort seemingly used for (Turrieff, Levy and Bisecker,2011)                      |
| 23. | (Turrieff, Macnamara, Levy and Bisecker, 2016)    | Y | Y- 310 self reported XXY aged 14-75     | Y – Thematic analysis.     | N/A                | N/A                                                                                           | N/A                         | N/A                                                                                                       | <b>Exclude</b><br>-Thematic analysis                                                                               |
| 24. | (Van Rijn and Swaab, 2011)                        | Y | Y – 73 Ks subjects                      | Y – Cross sectional study. | Y – Psychological, | Y- Wechsler Intelligence scales, Autism questionnaire, Schizotypal personality Questionnaire. | Y – 93 age matched controls | Y – Psychopathology traits were significantly higher with KS than the control group.                      | <b>Exclude</b><br>-Patient group recruited from same pool as (Rijn et al., 2008 & Rijn et al 2006).                |

|     |                                          |   |                                                                                             |                           |                                                                    |                                                                                                                       |                                                      |                                                                                                                                                                                   |                                                                                                                 |
|-----|------------------------------------------|---|---------------------------------------------------------------------------------------------|---------------------------|--------------------------------------------------------------------|-----------------------------------------------------------------------------------------------------------------------|------------------------------------------------------|-----------------------------------------------------------------------------------------------------------------------------------------------------------------------------------|-----------------------------------------------------------------------------------------------------------------|
| 25. | (Van Rijn and Swaab,2015)                | Y | Y – 23 KS boys, clearly labelled, other participants 17 girls with Trisomy X, XXX.          | Y – Cross sectional study | Y – Psychological                                                  | N– Outcome measures not shown for KS males                                                                            | Y – 100 non clinical controls, 47 boys and 53 girls. | Y – Executive function is impacted from an additional chromosome affecting everyday function.                                                                                     | <b>Exclude</b><br>-outcome measures                                                                             |
| 26. | (Van Rijn et al., 2014)                  | Y | Y – 34 boys with KS and 26 girls with Trisomy X                                             | Y – Cross sectional study | Y- Psychological, social relations                                 | Y – IQ, (SSRS), ( SRS), social anxiety.                                                                               | Y – 106 non clinical controls 46 boys and 60 girls.  | Y – Score between boys and girls were similar with an extra X, scores showed more prevalence in the test than the controls. Differences between boys and girls shown, in results. | <b>Include</b>                                                                                                  |
| 27. | (Van Rijn et al., 2016)                  | Y | Y – 29 KS boys and 21 Trisomy X girls. Various results explain both girls and boys results. | Y – Cross sectional study | Y – Psychological, thinking, learning and memory.                  | Y – IQ, Cognitive performance scores,                                                                                 | Y – 103 non-clinical controls.                       | Y – Intellectual functioning was lower in the KS group than controls. Early life stress has a greater negative on those with an extra chromosome than those without.              | <b>Exclude</b><br>-Same patient group used as (Van Rijn et al., 2013)                                           |
| 28. | (Van Rijn, de Sonnevile and Swaab, 2018) | Y | Y- 70 males with KS.                                                                        | Y – Cross sectional study | Y – Psychological, thinking, learning and memory. Social relations | Y – Wechsler Intelligence scales, Full scale IQ:FSIQ), (ANT),                                                         | N/A                                                  | Y – KS is linked to lower social cognition with regards to ToM, and fits other studies measuring similar outcomes.                                                                | <b>Exclude</b><br>-No comparator                                                                                |
| 29. | (Van Rijn, Swaab, Aleman and Khan, 2006) | Y | Y – 32 KS men                                                                               | Y – Cross sectional study | Y – Psychological, Social relations                                | Y – (Raven’s Advanced Progressive metrics, short form), (NART), Benton and Van Allen Test,                            | Y - 26 men from the general population.              | Y – KS had greater social cognition disturbances than that of the general population.                                                                                             | <b>Exclude</b><br>-Similar patient group from same participant pool as,(Van Rijn, Swaab, Aleman and Khan,2008). |
| 30. | (Van Rijn, Swaab, Aleman and Khan, 2008) | Y | Y – 31 KS men                                                                               | Y – Cross sectional study | Y – Psychological, Social relations                                | Y – (Ravens Advanced Progressive metrics, (NART), scale for interpersonal behaviour(SIB), (Autism spectrum Quotient), | Y – two groups of 24 and 20 male controls.           | Y – KS men had increased distress in social situations and less engagement in certain social situations. Ks also had significant higher autism traits.                            | <b>Include</b>                                                                                                  |

|    |                         |   |                                                  |                           |                                        |                                    |                         |                                                                                                                               |                |
|----|-------------------------|---|--------------------------------------------------|---------------------------|----------------------------------------|------------------------------------|-------------------------|-------------------------------------------------------------------------------------------------------------------------------|----------------|
| 31 | (Fabrazzo et al., 2021) | Y | Y – 23 Men with KS post 1-year androgen therapy. | Y – Cross-sectional study | Y – Overall and psychological measures | Y – Q-LES-Q, MMSE, SCL—90-R, TCI-R | Y – 23 healthy controls | Y – KS patients, treated for one year with testosterone undecanoate, do not yield a QoL compared to matched healthy controls. | <b>Include</b> |
|----|-------------------------|---|--------------------------------------------------|---------------------------|----------------------------------------|------------------------------------|-------------------------|-------------------------------------------------------------------------------------------------------------------------------|----------------|
